# Supplementary material for: Zn2+-storage mechanism in V6O13 with nanosheets for high-capacity and long-life aqueous zinc-metal batteries
Source: Royal Society of Chemistry journal article supplement (doi:10.1039/d4cc00850b), 2024-01-01
Supplement: d4cc00850b1.pdf [file d4cc00850b1.pdf]

## Supporting Information

### Insight the Zn<sup>2+</sup> storage mechanism in V<sub>6</sub>O<sub>13</sub> with Nano-sheets for High-capacity and Long-life Aqueous Zinc-Metal Batteries

Lineng Chen<sup>a</sup>, Wenwei Zhang<sup>a</sup>, Jianyong Zhang<sup>a</sup>, Qinyou An<sup>a,b,\*</sup>

a. State Key Laboratory of Advanced Technology for Materials Synthesis and Processing, Wuhan University of Technology, Wuhan 430070, China

b. Hubei Longzhong Laboratory, Wuhan University of Technology (Xiangyang Demonstration Zone), Xiangyang, 441000, P. R. China

### Experimental section

#### Materials synthesis

The V<sub>6</sub>O<sub>13</sub> nanosheets were prepared in two steps. Firstly, 0.85 g ammonium metavanadate and 1.06 g oxalic acid dihydrate (ratio mass 1:0.9) were dispersed into 30 mL deionized water, after 1 h magnetic force stirring, the yellow-green transparent solution was obtained. Subsequently, the mixture was transferred to a 50 mL Teflon-lined autoclave to be maintained at 180 °C for 48 h. After washed with deionized water and ethanol for several times, flowerlike NH<sub>4</sub>V<sub>4</sub>O<sub>10</sub> precursor were finally collected by dried at 80°C overnight. Secondly, V<sub>6</sub>O<sub>13</sub> nanosheet was obtained by annealing the precursor at 450 °C for 8 h in H<sub>2</sub>/Ar (5/95) atmosphere at heating rate of 5°C min<sup>-1</sup>. In this process, NH<sub>3</sub> decomposed from NH<sub>4</sub>V<sub>4</sub>O<sub>10</sub> acts as a reducing agent to facilitate the production of mixed valence vanadium with high electrical conductivity.

#### Material characterizations

The crystallographic characterization of the product was measured by a Bruker D8 Advance X-ray diffractometer with Cu-K $\alpha$  radiation ( $\lambda=1.5418$  Å). Field emission scanning electron microscopy (FESEM) images were obtained with a JEOL-7100F microscope. Energy dispersive X-ray spectra (EDS) was recorded using an Oxford EDS IE250 system. Transmission electron microscopy (TEM) and high-

resolution transmission electron microscopy (HRTEM) images were collected with a Thermo Fisher Scientific Talos F200S microscope. Raman spectrum measurement was achieved using a Renishaw RM-1000 laser Raman microscopy system. X-ray photoelectron spectroscopy (XPS) measurements were performed using a VG Multi Lab 2000 instrument. XPS measurement was performed with a VG Multi Lab 2000 instrument. The X-ray absorption near-edge structure (XANES) and Fourier transform extended X-ray absorption fine structure (FT-EXAFS) extended X-ray absorption spectroscopy data reduction and analysis followed standard methods using the ATHENA software package.

### **Electrochemical measurements**

To conduct the electrochemical measurements, the AZIBs were assembled with CR2016-type coin cells in the air atmosphere. The working electrodes was prepared by mixing 60 %  $V_6O_{13}$  nanosheets, 30 % acetylene black, and 10 % poly tetrafluoroethylene (PTFE), the solvents is isopropyl alcohol which is volatile, then the slurry was evenly grinded, tableted and cut into cut into small wafers with a diameter of  $\Phi 6$  mm, the mass loading is about  $1.42 \text{ mg cm}^{-2}$ . Zinc foil and  $1 \text{ mol L}^{-1}$   $Zn(CF_3SO_3)_2$  solution were used as the anode and electrolyte, respectively, and GF/A glass fiber membrane from What-man was used as the separator. The galvanostatic discharge-charge tests were performed with a battery test system (LAND CT2001A). Cyclic voltammograms (CV) and EIS were carried out on a multi-channel electrochemical workstation (VMP3 Bio-Logic France). For the in-situ characterization, the beryllium window used in traditional in-situ testing would react with electrolyte in AZIBs system, so an improved in-situ monitoring device was employed. The new cathode shell had a  $\Phi 2$  mm circular hole served as an information collection window for in-situ monitoring. The cell was cycled at a current density of  $500 \text{ mA g}^{-1}$ .

## Supplementary Figures

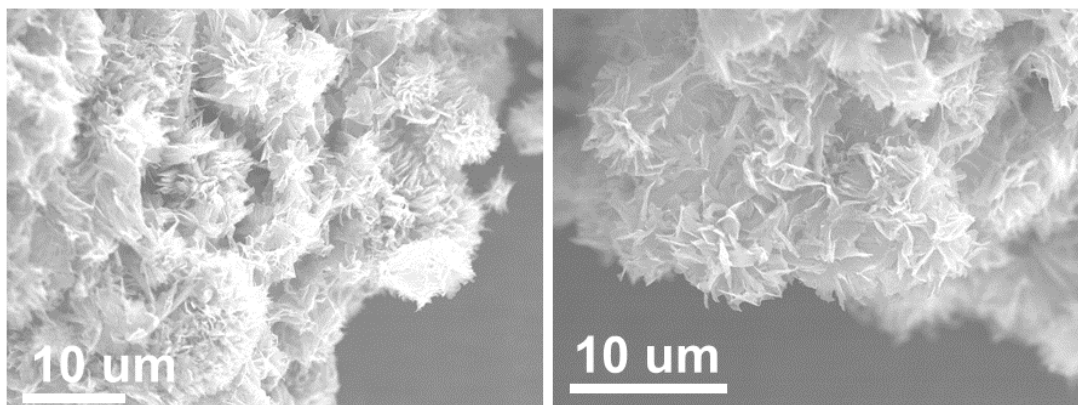

**Figure S1.** SEM image of precursor  $\text{NH}_4\text{V}_4\text{O}_{10}$  microflowers.

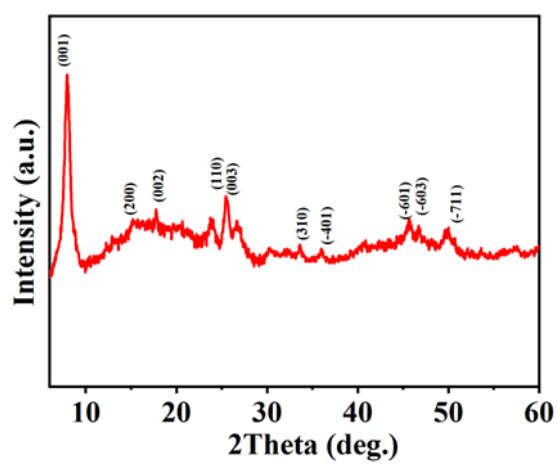

**Figure S2.** XRD patterns of precursor  $\text{NH}_4\text{V}_4\text{O}_{10}$ .

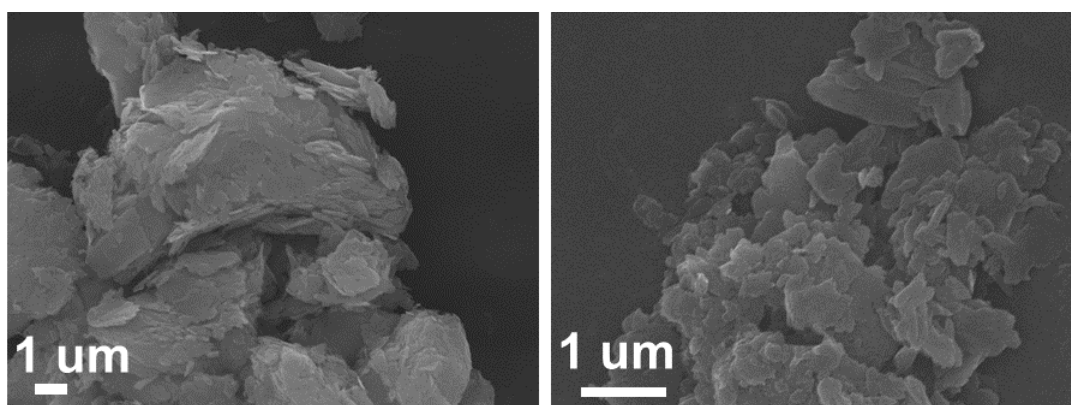

**Figure S3.** SEM images of the prepared  $\text{V}_6\text{O}_{13}$ .

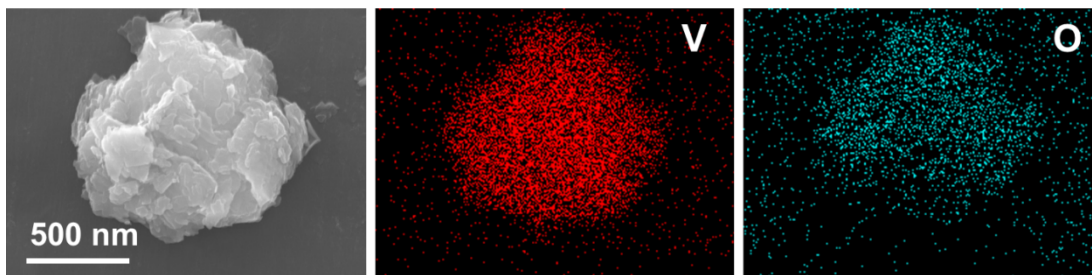

**Figure S4.** SEM-Mapping of the prepared  $V_6O_{13}$ .

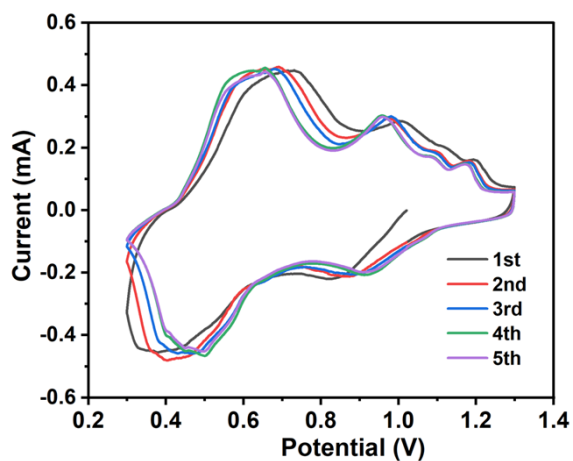

**Figure S5.** CV curves of the  $NH_4V_4O_{10}$  microflowers at  $0.1 \text{ mV s}^{-1}$ .

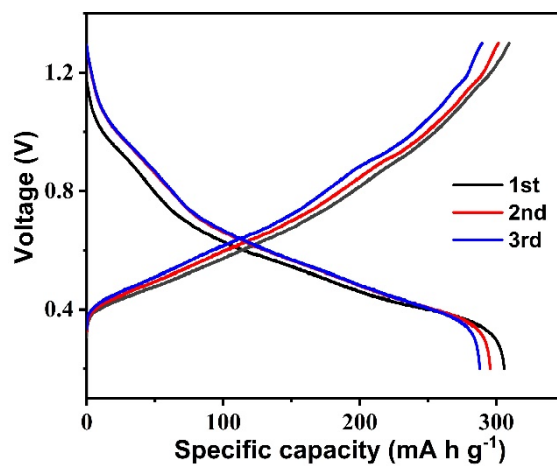

**Figure S6.** GCD curves of the  $Zn/NH_4V_4O_{10}$  cell in the initial three cycles at the current density of  $50 \text{ mA g}^{-1}$ .

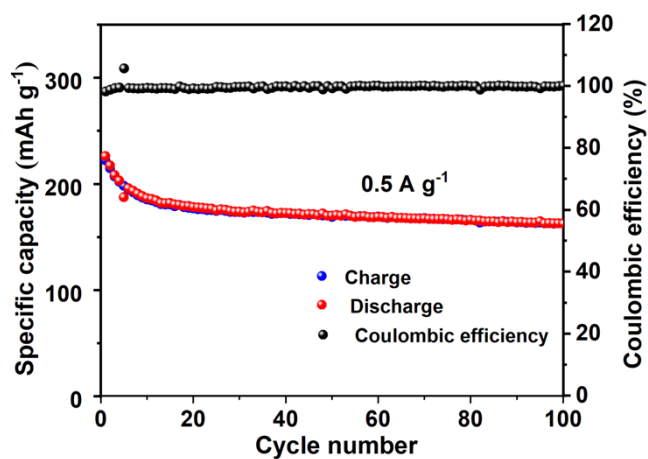

Figure S7. Cycling performance of Zn/ $\text{NH}_4\text{V}_4\text{O}_{10}$  battery at  $500 \text{ mA g}^{-1}$ .

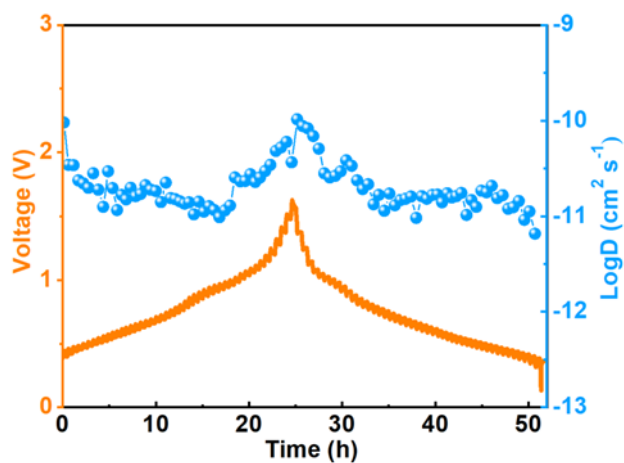

Figure S8. GITT curves and calculated  $\text{Zn}^{2+}$  diffusion coefficient of the  $\text{V}_6\text{O}_{13}$  cathode.

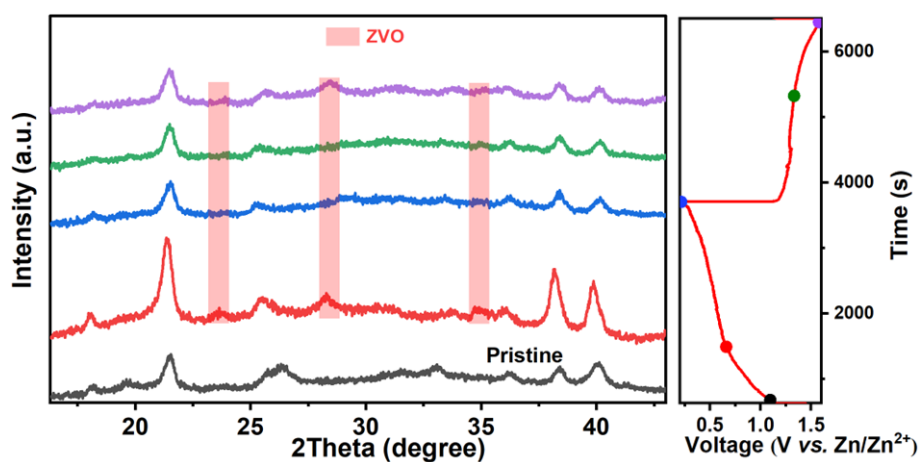

Figure S9. Ex-situ XRD patterns of prepared  $\text{V}_6\text{O}_{13}$  at the first cycle.

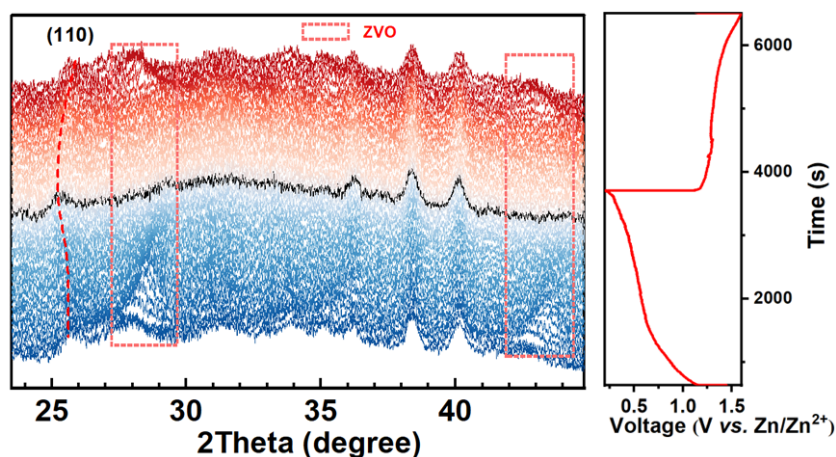

**Figure S10.** In-situ XRD patterns of the prepared  $V_6O_{13}$  at the second cycle.

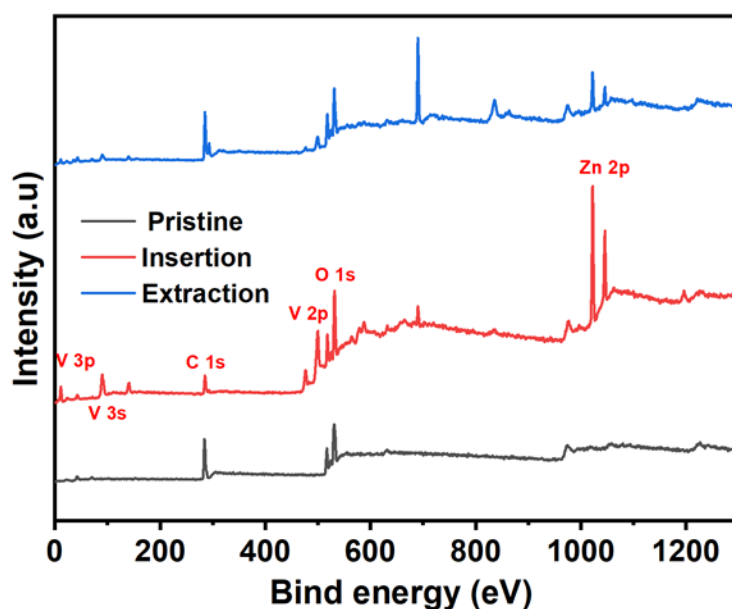

**Figure S11.** Ex-situ fully XPS spectra of prepared  $V_6O_{13}$  at the pristine, inserted and extracted states.

## Supplementary Table

**Table S1.** Comparison of the electrochemical performance between this work and other  $V_6O_{13}$  cathode materials in AZIBs.

| Materials              | Specific capacity<br>(mA h g <sup>-1</sup> /A g <sup>-1</sup> ) | Cycleing performance<br>(mA h g <sup>-1</sup> /A g <sup>-1</sup> /cycles) | Ref.             |
|------------------------|-----------------------------------------------------------------|---------------------------------------------------------------------------|------------------|
| $V_6O_{13}$ nanosheets | 425/0.05, 290/0.5                                               | 68/8/3000                                                                 | <b>This work</b> |
| $V_6O_{13}$            | 220/0.1, 142/1                                                  | 112/1/3000                                                                | 1                |
| $V_6O_{13}$            | 360/0.2                                                         | 230/4/2000                                                                | 2                |

|                                                                 |           |              |   |
|-----------------------------------------------------------------|-----------|--------------|---|
| V <sub>6</sub> O <sub>13</sub>                                  | 350/0.1   | 206/10/3000  | 3 |
| Tungsten-doped<br>V <sub>6</sub> O <sub>13</sub>                | 325/0.2   | 225/3.2/1000 | 4 |
| CO <sub>2</sub> -incorporated<br>V <sub>6</sub> O <sub>13</sub> | 471/0.1   | ~80/2/4000   | 5 |
| V <sub>6</sub> O <sub>13</sub> nanobelts on<br>carbon cloth     | 290/0.375 | 227/9/1000   | 6 |
| Oxygen-deficient<br>V <sub>6</sub> O <sub>13</sub>              | 401/0.2   | 398/0.2/200  | 7 |
| V <sub>6</sub> O <sub>13</sub> ·nH <sub>2</sub> O               | 395/0.1   | 151/5/1000   | 8 |

## Supplementary Note

### Galvanostatic intermittent titration study

The Galvanostatic intermittent titration technique (GITT) was applied to determine the thermodynamic voltage-composition relationship, which corresponds to the equilibrium phase diagram of the system. The Zn<sup>2+</sup> diffusion coefficients ( $D_{\text{Zn}^{2+}}$ ) in V<sub>6</sub>O<sub>13</sub> were calculated from the GITT data. In the GITT, the transient voltage generated due to the application of a current pulse is monitored as a function of time. In our study, a galvanostatic pulse (charge or discharge) at 20 mA g<sup>-1</sup> of 10 min is employed, followed by 30 min open circuit step to allow relaxation to equilibrium. The  $D_{\text{Zn}^{2+}}$  value of the V<sub>6</sub>O<sub>13</sub> electrode (Figure. S5) was evaluated by the following equation:<sup>9</sup>

$$D^{\text{GITT}} = \frac{4}{\pi \tau} \left( \frac{m_{\text{B}} V_{\text{M}}}{M_{\text{B}} S} \right)^2 \left( \frac{\Delta E_{\text{S}}}{\Delta E_{\text{T}}} \right)^2 \quad (1)$$

where  $\tau$  refers to constant current pulse time,  $m_{\text{B}}$ ,  $V_{\text{M}}$ ,  $M_{\text{B}}$ , and  $S$  are the mass, molar volume, molar mass of the cathode material, and electrode-electrolyte interface area, respectively.  $\Delta E_{\text{S}}$  is voltage difference during a single-step experiment, and

$\Delta E_{\tau}$  is the total change of cell voltage during a constant current pulse excluding the IR drop.

1. W. Wang, C. Yang, X. Chi, J. Liu, B. Wen and Y. Liu, *Energy Storage Mater.*, 2022, **53**, 774-782.
2. J. Shin, D. S. Choi, H. J. Lee, Y. Jung and J. W. Choi, *Adv. Energy Mater.*, 2019, **9**, 1900083.
3. L. Shan, J. Zhou, W. Zhang, C. Xia, S. Guo, X. Ma, G. Fang, X. Wu and S. Liang, *Energy Technol-GER*, 2019, **7**, 1900022.
4. J. Ding, J. Zhao, K. Zhao, S. Wang, S. Wu and S. Fang, *Small*, 2023, **19**, e2304130.
5. W. Shi, B. Yin, Y. Yang, M. B. Sullivan, J. Wang, Y. W. Zhang, Z. G. Yu, W. S. V. Lee and J. Xue, *ACS Nano*, 2021, **15**, 1273-1281.
6. M. Tamilselvan, T. V. M. Sreekanth, K. Yoo and J. Kim, *Appl. Surf. Sci.*, 2020, **529**, 147077.
7. M. Liao, J. Wang, L. Ye, H. Sun, Y. Wen, C. Wang, X. Sun, B. Wang and H. Peng, *Angew Chem. Int. Edit.*, 2020, **59**, 2273-2278.
8. J. Lai, H. Zhu, X. Zhu, H. Koritala and Y. Wang, *ACS Appl. Energy Mater.*, 2019, **2**, 1988-1996.
9. X. H. Rui, N. Ding, J. Liu, C. Li and C. H. Chen, *Electrochim. Acta*, 2010, **55**, 2384-2390.
